# Supplementary material
Source: publisher figshare collection journal article supplement (https://frontiersin.figshare.com/ndownloader/files/21376056)
Supplement: Supplementary file [file 21376056]

# Supplementary Material

## Supplementary Figures

|                               |     |     |     |     |     |     |     |     |     |     |     |     |     |     |     |     |     |     |     |     |     |     |     |     |     |     |     |     |     |     |
|-------------------------------|-----|-----|-----|-----|-----|-----|-----|-----|-----|-----|-----|-----|-----|-----|-----|-----|-----|-----|-----|-----|-----|-----|-----|-----|-----|-----|-----|-----|-----|-----|
|                               | 1   | 2   | 3   | 4   | 5   | 6   | 7   | 8   | 9   | 10  | 11  | 12  | 13  | 14  | 15  | 16  | 17  | 18  | 19  | 20  | 21  | 22  | 23  | 24  | 25  | 26  | 27  | 28  | 29  | 30  |
| PhoCI                         | V   | I   | P   | D   | Y   | F   | K   | Q   | S   | F   | P   | E   | G   | Y   | S   | W   | E   | R   | S   | M   | T   | Y   | E   | D   | G   | G   | I   | C   | I   | A   |
| Pho-Strong                    | V   | I   | P   | D   | Y   | F   | K   | Q   | S   | F   | P   | E   | G   | Y   | S   | W   | E   | R   | S   | M   | T   | Y   | E   | D   | G   | G   | I   | C   | I   | A   |
| Pho-Weak                      | V   | I   | P   | D   | Y   | F   | K   | Q   | S   | F   | P   | E   | G   | Y   | S   | W   | E   | R   | S   | M   | T   | Y   | E   | D   | G   | G   | I   | C   | I   | A   |
| Pho-Strong-(GB1) <sub>2</sub> | V   | I   | P   | D   | Y   | F   | K   | Q   | S   | F   | P   | E   | G   | Y   | S   | W   | E   | R   | S   | M   | T   | Y   | E   | D   | G   | G   | I   | C   | I   | A   |
| Pho-Weak-(GB1) <sub>2</sub>   | V   | I   | P   | D   | Y   | F   | K   | Q   | S   | F   | P   | E   | G   | Y   | S   | W   | E   | R   | S   | M   | T   | Y   | E   | D   | G   | G   | I   | C   | I   | A   |
|                               | 31  | 32  | 33  | 34  | 35  | 36  | 37  | 38  | 39  | 40  | 41  | 42  | 43  | 44  | 45  | 46  | 47  | 48  | 49  | 50  | 51  | 52  | 53  | 54  | 55  | 56  | 57  | 58  | 59  | 60  |
| PhoCI                         | T   | N   | D   | I   | T   | M   | E   | G   | D   | S   | F   | I   | N   | K   | I   | H   | F   | K   | G   | T   | N   | F   | P   | C   | N   | G   | P   | V   | M   | Q   |
| Pho-Strong                    | T   | N   | D   | I   | T   | M   | E   | G   | D   | S   | F   | I   | N   | K   | I   | H   | F   | K   | G   | T   | N   | F   | P   | C   | N   | G   | P   | V   | M   | Q   |
| Pho-Weak                      | T   | N   | D   | I   | T   | M   | E   | G   | D   | S   | F   | I   | N   | K   | I   | H   | F   | K   | G   | T   | N   | F   | P   | C   | N   | G   | P   | V   | M   | Q   |
| Pho-Strong-(GB1) <sub>2</sub> | T   | N   | D   | I   | T   | M   | E   | G   | D   | S   | F   | I   | N   | K   | I   | H   | F   | K   | G   | T   | N   | F   | P   | C   | N   | G   | P   | V   | M   | Q   |
| Pho-Weak-(GB1) <sub>2</sub>   | T   | N   | D   | I   | T   | M   | E   | G   | D   | S   | F   | I   | N   | K   | I   | H   | F   | K   | G   | T   | N   | F   | P   | C   | N   | G   | P   | V   | M   | Q   |
|                               | 61  | 62  | 63  | 64  | 65  | 66  | 67  | 68  | 69  | 70  | 71  | 72  | 73  | 74  | 75  | 76  | 77  | 78  | 79  | 80  | 81  | 82  | 83  | 84  | 85  | 86  | 87  | 88  | 89  | 90  |
| PhoCI                         | K   | R   | T   | V   | G   | W   | E   | A   | S   | T   | E   | K   | M   | Y   | E   | R   | D   | G   | V   | L   | K   | G   | D   | V   | K   | M   | K   | L   | L   | L   |
| Pho-Strong                    | K   | R   | T   | V   | G   | W   | E   | A   | S   | T   | E   | K   | M   | Y   | E   | R   | D   | G   | V   | L   | K   | G   | D   | V   | K   | M   | K   | L   | L   | L   |
| Pho-Weak                      | K   | R   | T   | V   | G   | W   | E   | A   | S   | T   | E   | K   | M   | Y   | E   | R   | D   | G   | V   | L   | K   | G   | D   | V   | K   | M   | K   | L   | L   | L   |
| Pho-Strong-(GB1) <sub>2</sub> | K   | R   | T   | V   | G   | W   | E   | A   | S   | T   | E   | K   | M   | Y   | E   | R   | D   | G   | V   | L   | K   | G   | D   | V   | K   | M   | K   | L   | L   | L   |
| Pho-Weak-(GB1) <sub>2</sub>   | K   | R   | T   | V   | G   | W   | E   | A   | S   | T   | E   | K   | M   | Y   | E   | R   | D   | G   | V   | L   | K   | G   | D   | V   | K   | M   | K   | L   | L   | L   |
|                               | 91  | 92  | 93  | 94  | 95  | 96  | 97  | 98  | 99  | 100 | 101 | 102 | 103 | 104 | 105 | 106 | 107 | 108 | 109 | 110 | 111 | 112 | 113 | 114 | 115 | 116 | 117 | 118 | 119 | 120 |
| PhoCI                         | K   | G   | G   | G   | H   | Y   | R   | C   | D   | Y   | R   | T   | T   | Y   | K   | V   | K   | Q   | K   | P   | V   | K   | L   | P   | D   | Y   | H   | F   | V   | D   |
| Pho-Strong                    | K   | G   | G   | G   | H   | Y   | R   | C   | D   | Y   | R   | T   | T   | Y   | K   | V   | K   | Q   | K   | P   | V   | K   | L   | P   | D   | Y   | H   | F   | V   | D   |
| Pho-Weak                      | K   | G   | G   | G   | H   | Y   | R   | C   | D   | Y   | R   | T   | T   | Y   | K   | V   | K   | Q   | K   | P   | V   | K   | L   | P   | D   | Y   | H   | F   | V   | D   |
| Pho-Strong-(GB1) <sub>2</sub> | K   | G   | G   | G   | H   | Y   | R   | C   | D   | Y   | R   | T   | T   | Y   | K   | V   | K   | Q   | K   | P   | V   | K   | L   | P   | D   | Y   | H   | F   | V   | D   |
| Pho-Weak-(GB1) <sub>2</sub>   | K   | G   | G   | G   | H   | Y   | R   | C   | D   | Y   | R   | T   | T   | Y   | K   | V   | K   | Q   | K   | P   | V   | K   | L   | P   | D   | Y   | H   | F   | V   | D   |
|                               | 121 | 122 | 123 | 124 | 125 | 126 | 127 | 128 | 129 | 130 | 131 | 132 | 133 | 134 | 135 | 136 | 137 | 138 | 139 | 140 | 141 | 142 | 143 | 144 | 145 | 146 | 147 | 148 | 149 | 150 |
| PhoCI                         | H   | R   | I   | E   | I   | L   | S   | H   | D   | K   | D   | Y   | N   | K   | V   | K   | L   | Y   | E   | H   | A   | V   | A   | R   | N   | S   | T   | D   | S   | M   |
| Pho-Strong                    | H   | R   | I   | E   | I   | L   | S   | H   | D   | K   | D   | Y   | N   | K   | V   | K   | L   | Y   | E   | H   | A   | V   | A   | R   | N   | S   | T   | D   | S   | M   |
| Pho-Weak                      | H   | R   | I   | E   | I   | L   | S   | H   | D   | K   | D   | Y   | N   | K   | V   | K   | L   | Y   | E   | H   | A   | V   | A   | R   | N   | S   | T   | D   | S   | M   |
| Pho-Strong-(GB1) <sub>2</sub> | H   | R   | I   | E   | I   | L   | S   | H   | D   | K   | D   | Y   | N   | K   | V   | K   | L   | Y   | E   | H   | A   | V   | A   | R   | N   | S   | T   | D   | S   | M   |
| Pho-Weak-(GB1) <sub>2</sub>   | H   | R   | I   | E   | I   | L   | S   | H   | D   | K   | D   | Y   | N   | K   | V   | K   | L   | Y   | E   | H   | A   | V   | A   | R   | N   | S   | T   | D   | S   | M   |
|                               | 151 | 152 | 153 | 154 | 155 | 156 | 157 | 158 | 159 | 160 | 161 | 162 | 163 | 164 | 165 | 166 | 167 | 168 | 169 | 170 | 171 | 172 | 173 | 174 | 175 | 176 | 177 | 178 | 179 | 180 |
| PhoCI                         | D   | E   | L   | Y   | K   | G   | G   | S   | G   | G   | M   | V   | S   | K   | G   | E   | E   | T   | I   | T   | S   | V   | I   | K   | P   | D   | M   | K   | N   | K   |
| Pho-Strong                    | D   | E   | L   | Y   | K   | G   | G   | S   | G   | G   | M   | V   | S   | K   | G   | E   | E   | T   | I   | T   | S   | V   | I   | K   | P   | D   | M   | K   | N   | K   |
| Pho-Weak                      | D   | E   | L   | Y   | K   | G   | G   | S   | G   | G   | M   | V   | S   | K   | G   | E   | E   | T   | I   | T   | S   | V   | I   | K   | P   | D   | M   | K   | N   | K   |
| Pho-Strong-(GB1) <sub>2</sub> | D   | E   | L   | Y   | K   | G   | G   | S   | G   | G   | M   | V   | S   | K   | G   | E   | E   | T   | I   | T   | S   | V   | I   | K   | P   | D   | M   | K   | N   | K   |
| Pho-Weak-(GB1) <sub>2</sub>   | D   | E   | L   | Y   | K   | G   | G   | S   | G   | G   | M   | V   | S   | K   | G   | E   | E   | T   | I   | T   | S   | V   | I   | K   | P   | D   | M   | K   | N   | K   |
|                               | 181 | 182 | 183 | 184 | 185 | 186 | 187 | 188 | 189 | 190 | 191 | 192 | 193 | 194 | 195 | 196 | 197 | 198 | 199 | 200 | 201 | 202 | 203 | 204 | 205 | 206 | 207 | 208 | 209 | 210 |
| PhoCI                         | L   | R   | M   | E   | G   | N   | V   | N   | G   | H   | A   | F   | V   | I   | E   | G   | E   | G   | S   | G   | K   | P   | F   | E   | G   | I   | Q   | T   | I   | D   |
| Pho-Strong                    | L   | R   | M   | E   | G   | N   | V   | N   | G   | H   | A   | F   | V   | I   | E   | G   | E   | G   | S   | G   | K   | P   | F   | E   | G   | I   | Q   | T   | I   | D   |
| Pho-Weak                      | L   | R   | M   | E   | G   | N   | V   | N   | G   | H   | A   | F   | V   | I   | E   | G   | E   | G   | S   | G   | K   | P   | F   | E   | G   | I   | Q   | T   | I   | D   |
| Pho-Strong-(GB1) <sub>2</sub> | L   | R   | M   | E   | G   | N   | V   | N   | G   | H   | A   | F   | V   | I   | E   | G   | E   | G   | S   | G   | K   | P   | F   | E   | G   | I   | Q   | T   | I   | D   |
| Pho-Weak-(GB1) <sub>2</sub>   | L   | R   | M   | E   | G   | N   | V   | N   | G   | H   | A   | F   | V   | I   | E   | G   | E   | G   | S   | G   | K   | P   | F   | E   | G   | I   | Q   | T   | I   | D   |
|                               | 211 | 212 | 213 | 214 | 215 | 216 | 217 | 218 | 219 | 220 | 221 | 222 | 223 | 224 | 225 | 226 | 227 | 228 | 229 | 230 | 231 | 232 | 233 | 234 | 235 | 236 | 237 | 238 | 239 | 240 |
| PhoCI                         | L   | E   | V   | K   | E   | G   | A   | P   | L   | P   | F   | A   | Y   | D   | I   | L   | T   | T   | A   | F   | H   | Y   | G   | N   | R   | V   | F   | T   | K   | Y   |
| Pho-Strong                    | L   | E   | V   | K   | E   | G   | A   | P   | L   | P   | F   | A   | Y   | D   | I   | L   | T   | T   | A   | F   | H   | Y   | G   | N   | R   | V   | F   | T   | K   | Y   |
| Pho-Weak                      | L   | E   | V   | K   | E   | G   | A   | P   | L   | P   | F   | A   | Y   | D   | I   | L   | T   | T   | A   | F   | H   | Y   | G   | N   | R   | V   | F   | T   | K   | Y   |
| Pho-Strong-(GB1) <sub>2</sub> | L   | E   | V   | K   | E   | G   | A   | P   | L   | P   | F   | A   | Y   | D   | I   | L   | T   | T   | A   | F   | H   | Y   | G   | N   | R   | V   | F   | T   | K   | Y   |
| Pho-Weak-(GB1) <sub>2</sub>   | L   | E   | V   | K   | E   | G   | A   | P   | L   | P   | F   | A   | Y   | D   | I   | L   | T   | T   | A   | F   | H   | Y   | G   | N   | R   | V   | F   | T   | K   | Y   |
|                               | 241 | 242 | 243 | 244 | 245 | 246 | 247 | 248 | 249 | 250 | 251 | 252 | 253 | 254 | 255 | 256 | 257 | 258 | 259 | 260 | 261 | 262 | 263 | 264 | 265 | 266 | 267 | 268 | 269 | 270 |
| PhoCI                         | P   | R   |     |     |     |     |     |     |     |     |     |     |     |     |     |     |     |     |     |     |     |     |     |     |     |     |     |     |     |     |
| Pho-Strong                    | P   | R   |     |     |     |     |     |     |     |     |     |     |     |     |     |     |     |     |     |     |     |     |     |     |     |     |     |     |     |     |
| Pho-Weak                      | P   | R   | G   | G   | G   | R   | S   | G   | G   | C   |     |     |     |     |     |     |     |     |     |     |     |     |     |     |     |     |     |     |     |     |
| Pho-Strong-(GB1) <sub>2</sub> | P   | R   | G   | G   | G   | R   | S   | M   | D   | T   | Y   | K   | L   | I   | L   | N   | G   | K   | T   | L   | K   | G   | E   | T   | T   | T   | E   | A   | V   | D   |
| Pho-Weak-(GB1) <sub>2</sub>   | P   | R   | G   | G   | G   | R   | S   | M   | D   | T   | Y   | K   | L   | I   | L   | N   | G   | K   | T   | L   | K   | G   | E   | T   | T   | T   | E   | A   | V   | D   |
|                               | 271 | 272 | 273 | 274 | 275 | 276 | 277 | 278 | 279 | 280 | 281 | 282 | 283 | 284 | 285 | 286 | 287 | 288 | 289 | 290 | 291 | 292 | 293 | 294 | 295 | 296 | 297 | 298 | 299 | 300 |
| PhoCI                         |     |     |     |     |     |     |     |     |     |     |     |     |     |     |     |     |     |     |     |     |     |     |     |     |     |     |     |     |     |     |
| Pho-Strong                    |     |     |     |     |     |     |     |     |     |     |     |     |     |     |     |     |     |     |     |     |     |     |     |     |     |     |     |     |     |     |
| Pho-Weak                      |     |     |     |     |     |     |     |     |     |     |     |     |     |     |     |     |     |     |     |     |     |     |     |     |     |     |     |     |     |     |
| Pho-Strong-(GB1) <sub>2</sub> | A   | A   | T   | A   | E   | K   | V   | F   | K   | Q   | Y   | A   | N   | D   | N   | G   | V   | D   | G   | E   | W   | T   | Y   | D   | D   | A   | T   | K   | T   | F   |
| Pho-Weak-(GB1) <sub>2</sub>   | A   | A   | T   | A   | E   | K   | V   | F   | K   | Q   | Y   | A   | N   | D   | N   | G   | V   | D   | G   | E   | W   | T   | Y   | D   | D   | A   | T   | K   | T   | F   |
|                               | 301 | 302 | 303 | 304 | 305 | 306 | 307 | 308 | 309 | 310 | 311 | 312 | 313 | 314 | 315 | 316 | 317 | 318 | 319 | 320 | 321 | 322 | 323 | 324 | 325 | 326 | 327 | 328 | 329 | 330 |
| PhoCI                         |     |     |     |     |     |     |     |     |     |     |     |     |     |     |     |     |     |     |     |     |     |     |     |     |     |     |     |     |     |     |
| Pho-Strong                    |     |     |     |     |     |     |     |     |     |     |     |     |     |     |     |     |     |     |     |     |     |     |     |     |     |     |     |     |     |     |
| Pho-Weak                      |     |     |     |     |     |     |     |     |     |     |     |     |     |     |     |     |     |     |     |     |     |     |     |     |     |     |     |     |     |     |
| Pho-Strong-(GB1) <sub>2</sub> | T   | V   | T   | E   | R   | S   | M   | D   | T   | Y   | K   | L   | I   | L   | N   | G   | K   | T   | L   | K   | G   | E   | T   | T   | T   | E   | A   | V   | D   | A   |
| Pho-Weak-(GB1) <sub>2</sub>   | T   | V   | T   | E   | R   | S   | M   | D   | T   | Y   | K   | L   | I   | L   | N   | G   | K   | T   | L   | K   | G   | E   | T   | T   | T   | E   | A   | V   | D   | A   |
|                               | 331 | 332 | 333 | 334 | 335 | 336 | 337 | 338 | 339 | 340 | 341 | 342 | 343 | 344 | 345 | 346 | 347 | 348 | 349 | 350 | 351 | 352 | 353 | 354 | 355 | 356 | 357 | 358 | 359 | 360 |
| PhoCI                         |     |     |     |     |     |     |     |     |     |     |     |     |     |     |     |     |     |     |     |     |     |     |     |     |     |     |     |     |     |     |
| Pho-Strong                    |     |     |     |     |     |     |     |     |     |     |     |     |     |     |     |     |     |     |     |     |     |     |     |     |     |     |     |     |     |     |
| Pho-Weak                      |     |     |     |     |     |     |     |     |     |     |     |     |     |     |     |     |     |     |     |     |     |     |     |     |     |     |     |     |     |     |
| Pho-Strong-(GB1) <sub>2</sub> | A   | T   | A   | E   | K   | V   |     |     |     |     |     |     |     |     |     |     |     |     |     |     |     |     |     |     |     |     |     |     |     |     |

**Supplementary Figure 1.** Sequence alignment of PhoCl and PhoCl variants. Mutations relative to PhoCl are represented highlighted with a green background. GB1 fragments are highlighted by a cyan background. The site of photocleavage is indicated with an arrow and purple background.

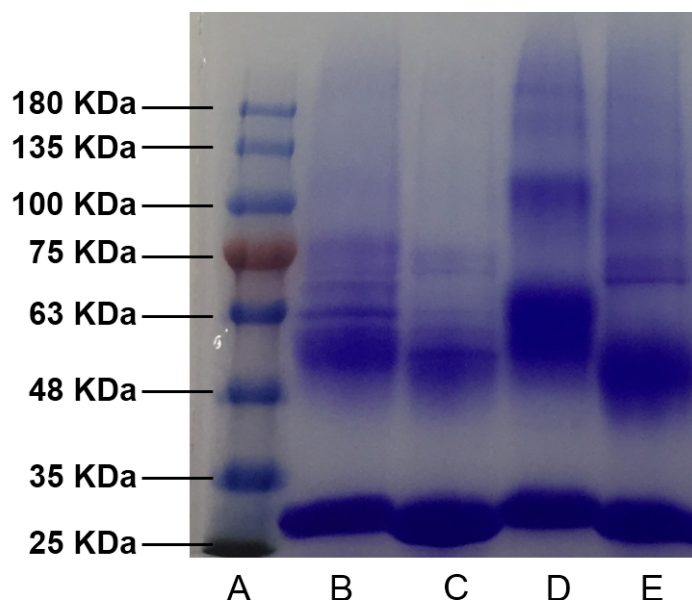

**Supplementary Figure 2.** SDS-PAGE of PhoCl mutants reacting with PEG-Mal (10 kDa) before and after photocleavage. A: Ladder; B: Pho-Weak Light off; C: Pho-Weak Light on; D: Pho-Strong Light off; E: Pho-Strong Light on. Based on the grey scale analysis, the reaction yields were 54% for Pho-Weak and 65% for Pho-Strong. The success of the photocleavage reaction was also confirmed.
